# Supplementary material for: Sterol 14-α-demethylase is vital for mitochondrial functions and stress tolerance in Leishmania major
Source: PubMed Central journal article supplement (PMC7462297; doi:10.1371/journal.ppat.1008810), 2020-08-20

**A**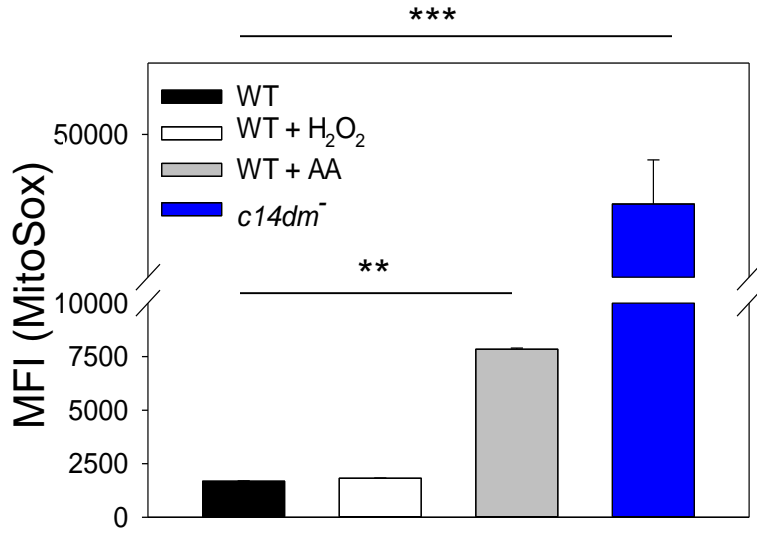**B**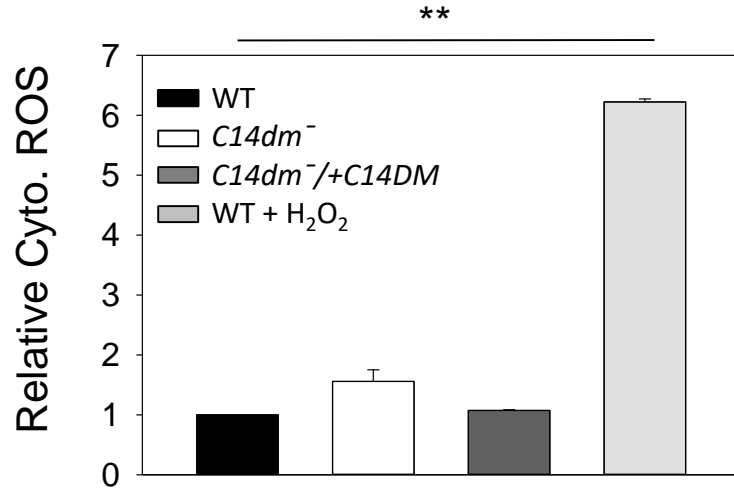

Supplement: ppat.1008810.s003.pdf [file ppat.1008810.s003.pdf]
